# Supplementary material for: Neutrophils Facilitate Prolonged Inflammasome Response in the DAMP-Rich Inflammatory Milieu
Source: PubMed Central journal article supplement (PMC8511454; doi:10.3389/fimmu.2021.746032), 2021-09-29
Supplement: DataSheet_1.pdf [file DataSheet_1.pdf]

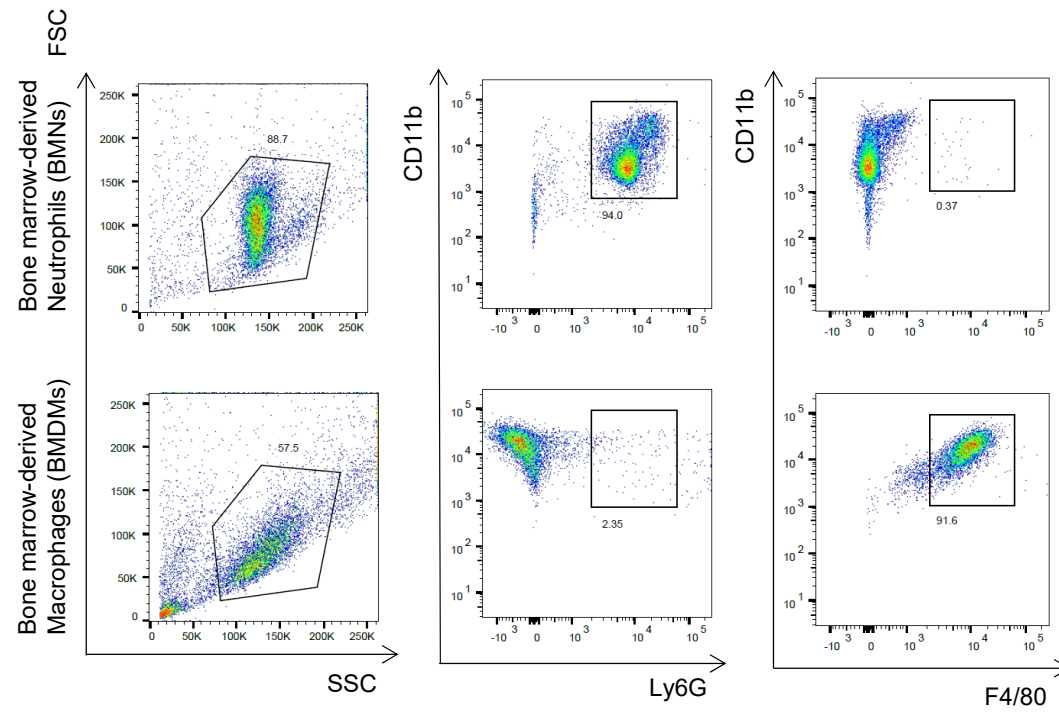

**Supplementary Figure S1. Flow cytometric analysis of mouse bone marrow-derived neutrophils and macrophages.** Mouse bone marrow-derived neutrophils or macrophages were stained with anti-CD11b, Ly6G and F4/80 antibodies and the fluorescence of the cells was then monitored and analyzed by flow cytometry.

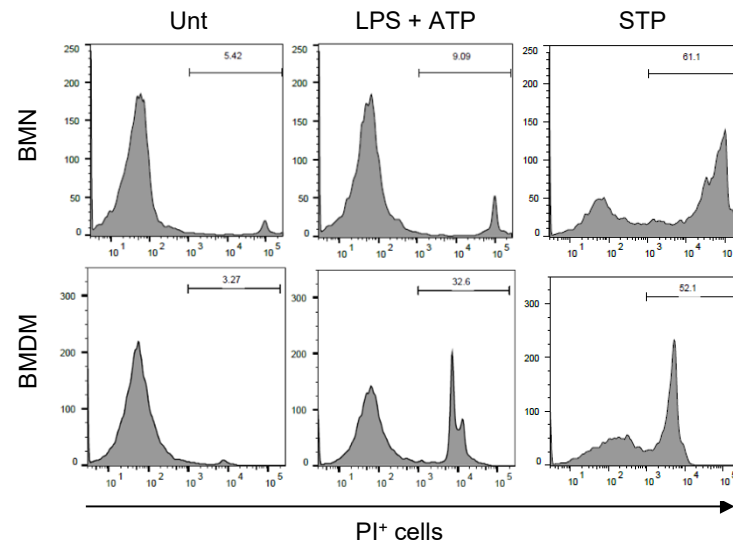

**Supplementary Figure S2. Cell death analysis of neutrophils and macrophages after LPS/ATP or staurosporine stimulation.** Representative flow cytometric diagram of mouse BMNs or BMDMs primed with LPS (0.25  $\mu\text{g}/\text{mL}$ , 2.5 h) followed by ATP (2.5 mM, 1 h) treatment or staurosporine (STP, 2  $\mu\text{g}/\text{mL}$ , 6 h) treatment after propidium iodide (PI) staining.

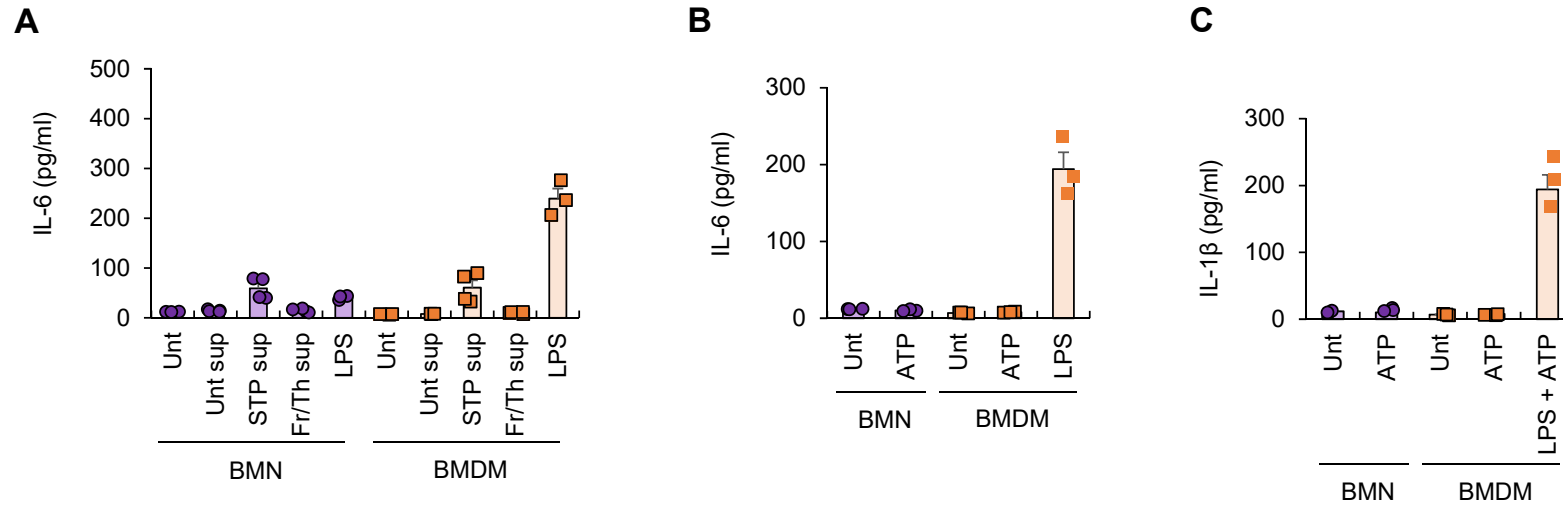

**Supplementary Figure S3. Impaired IL-6 production from neutrophils. (A)** Quantification of IL-6 in the culture supernatants of mouse bone marrow-derived neutrophils (BMNs) or bone marrow-derived macrophages (BMDMs) treated with cell-free supernatants from untreated or injured BMDMs by staurosporine (STP) or repeated freeze/thaw (Fr/Tha) cycles, or treated with LPS (0.25  $\mu$ g/ml, 3 h). ( $n = 3$ ) **(B)** Quantification of IL-6 in the culture supernatants of mouse BMNs or BMDMs treated with ATP (2.5 mM, 1 h) or LPS (0.25  $\mu$ g/ml, 3 h). ( $n = 3$ ) **(C)** Quantification of IL-1 $\beta$  in the culture supernatants of mouse BMNs or BMDMs treated with ATP (2.5 mM, 1 h) or LPS (0.25  $\mu$ g/ml, 3 h), followed by ATP (2.5 mM, 30 min). ( $n = 3$ )

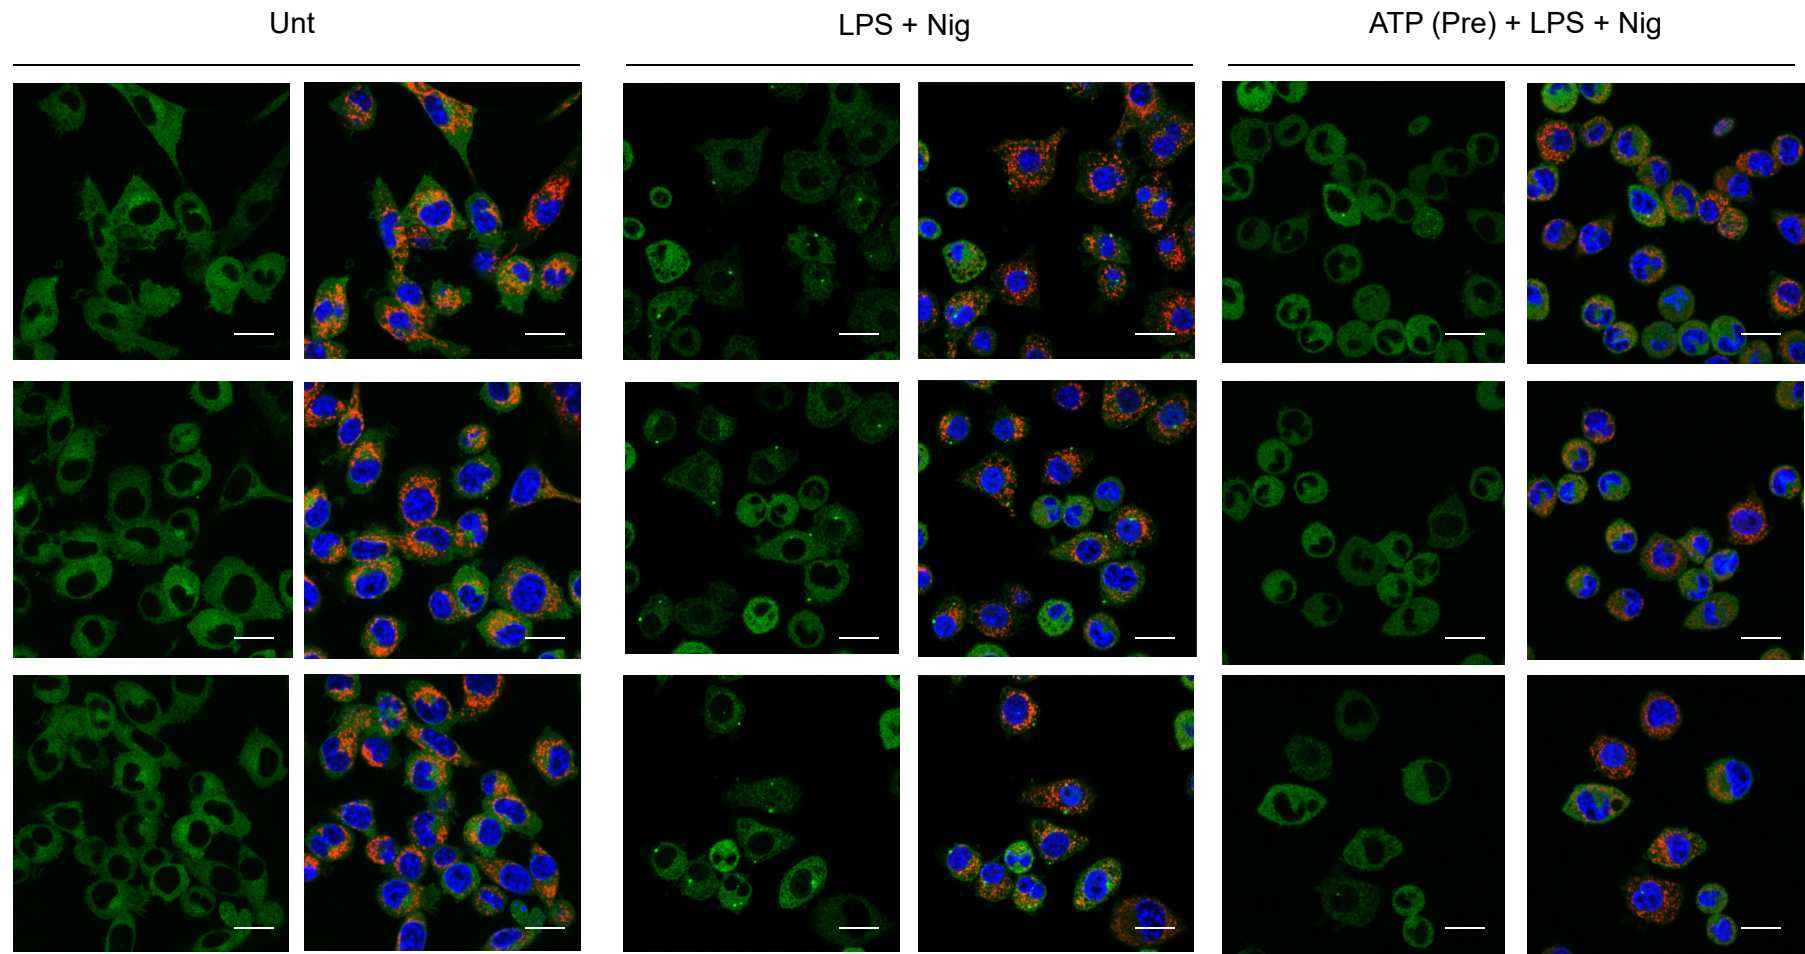

**Supplementary Figure S4. Effect of ATP pretreatment on the NLRP3 oligomerization in mouse bone marrow-derived macrophages.**

Representative immunofluorescent images of NLRP3-GFP-expressing immortalized BMDMs pretreated with ATP (2 mM, 30 min), washed and treated with LPS (0.25  $\mu$ g/ml, 2.5 h), followed by nigericin (Nig, 5  $\mu$ M, 30 min) treatment after staining with anti-Tom20 antibody (red). DAPI represents the nuclear signal (blue). Scale bars, 20  $\mu$ m.

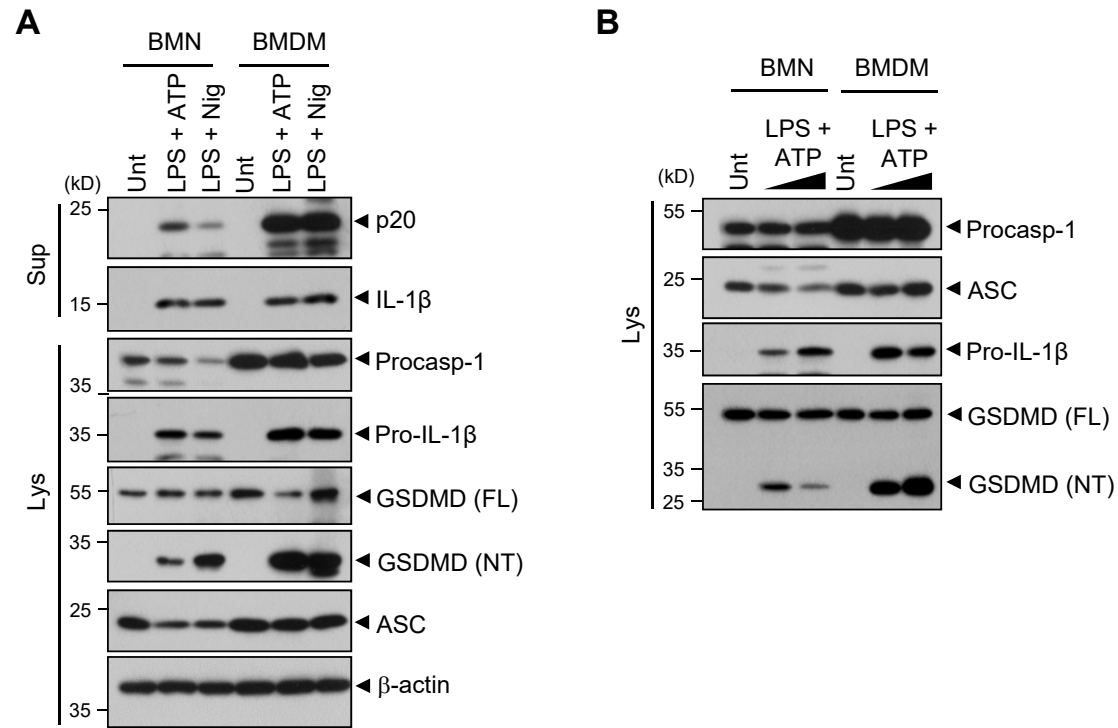

**Supplementary Figure S5. Immunoblots from neutrophils or macrophages in response to NLRP3-activating stimulations.** (A) Mouse neutrophils or macrophages were primed with LPS (0.25  $\mu$ g/ml, 2.5 h) followed by ATP (2.5 mM, 1 h) or nigericin (5  $\mu$ M, 1 h) treatment. (B) Mouse neutrophils or macrophages were primed with LPS (0.25  $\mu$ g/ml, 2.5 h) followed by ATP (2.5 mM, 1 or 3 h) treatment. Culture supernatants (Sup) or cellular lysates (Lys) were immunoblotted with the indicated antibodies. GSDMD; gasdermin D, FL; full length, NT; N-terminal.

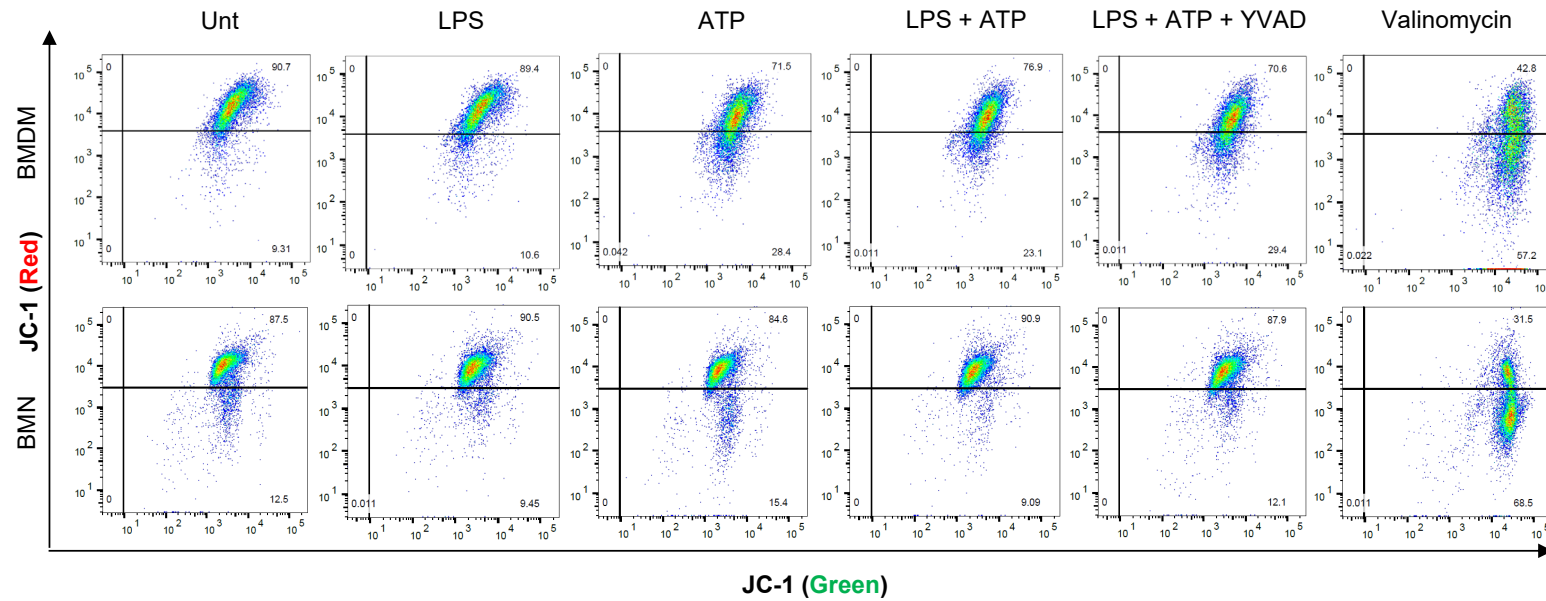

**Supplementary Figure S6. Mitochondrial membrane potential of neutrophils or macrophages in response to NLRP3-activating stimulations.** Flow cytometric analysis of mouse BMNs or BMDMs treated with LPS (0.25  $\mu$ g/mL) alone, ATP (2.5 mM) alone, LPS followed by ATP treatment in the presence of YVAD (20  $\mu$ M) or valinomycin treatment (5  $\mu$ M) after JC-1 staining.

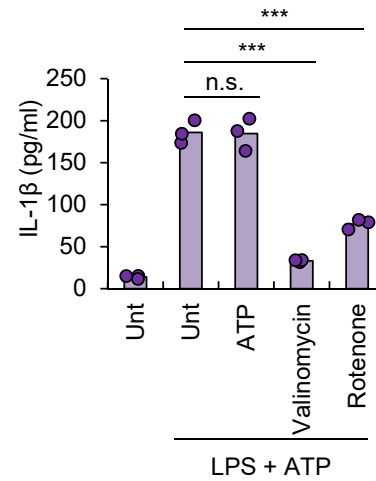

**Supplementary Figure S7. Effect of mitochondrial depolarization on the NLRP3-activating potential in neutrophils.** Quantification of IL-1 $\beta$  in the culture supernatant from mouse BMNs pretreated with ATP (2.5 mM), valinomycin (5  $\mu$ M) or rotenone (5  $\mu$ M) for 30 min, washed and primed with LPS (0.25  $\mu$ g/mL, 2.5 h) followed by ATP (2.5 mM, 30 min) treatment ( $n = 3$ ). \*\*\* $P < 0.001$ , n.s. not significant.

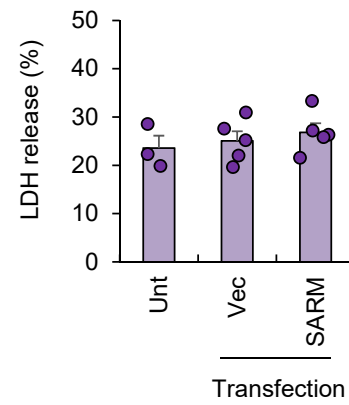

**Supplementary Figure S8. Cell death analysis of neutrophils after transfection.** Quantification of LDH release into cell culture supernatants of bone marrow-derived neutrophils transfected with empty vector (Vec) or Sarm1-expressing construct (SARM) for 22 h. ( $n = 3 \sim 5$ )



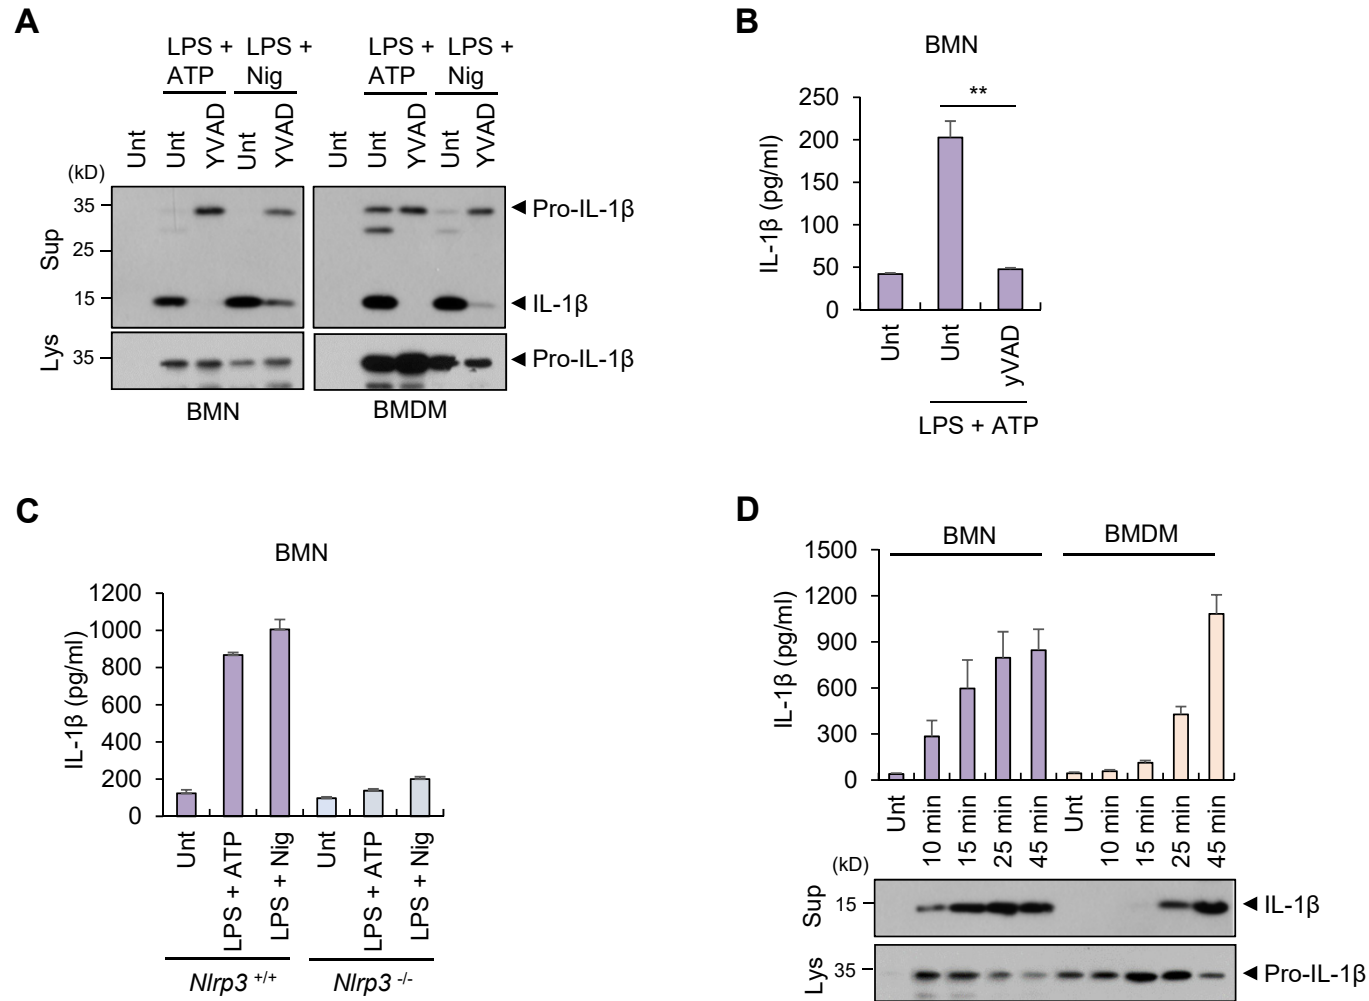

**Supplementary Figure S9. Neutrophils exhibit caspase-1- and NLRP3-dependent IL-1 $\beta$  processing and secretion.** (A) Immunoblots of mouse BMNs or BMDMs primed with LPS (0.25  $\mu$ g/mL) followed by ATP (2.5 mM) or nigericin (5  $\mu$ M) treatment in the presence of ac-YVAD-cmk (20  $\mu$ M). (B) Quantification of IL-1 $\beta$  in the culture supernatant of mouse BMNs primed with LPS (0.25  $\mu$ g/mL) followed by ATP (2.5 mM) treatment in the presence of ac-YVAD-cmk (20  $\mu$ M) ( $n = 3$ ). (C) Quantification of IL-1 $\beta$  in the culture supernatant of *Nlrp3*<sup>+/+</sup> or *Nlrp3*<sup>-/-</sup> mouse BMNs treated with LPS (0.25  $\mu$ g/mL) followed by ATP (2.5 mM) or nigericin (5  $\mu$ M) treatment. ( $n = 3$ ) (D) Quantification of IL-1 $\beta$  in the culture supernatant (upper panel) and immunoblots (lower panel) of mouse BMNs or BMDMs primed with LPS (0.25  $\mu$ g/mL) followed by ATP treatment (2.5 mM) ( $n = 3$ ). Culture supernatants (Sup) or cellular lysates (Lys) were immunoblotted with the indicated antibodies.

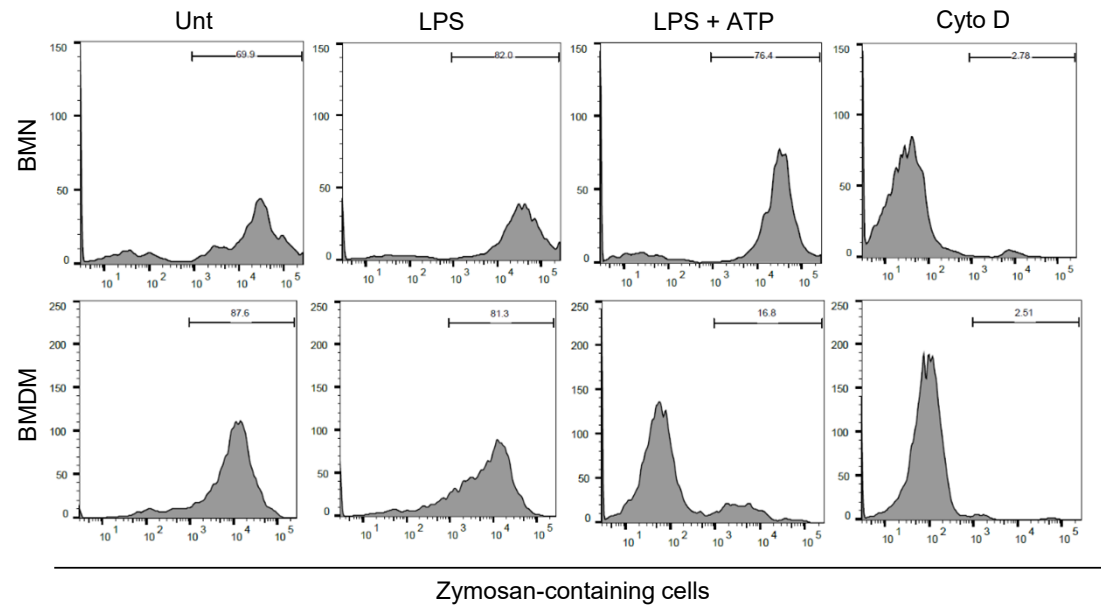

**Supplementary Figure S10. Phagocytic activity of neutrophils and macrophages after inflammasome activation.** Mouse BMNs or BMDMs were untreated (Unt) or treated with LPS (0.25  $\mu\text{g}/\text{mL}$ , 2.5 h) alone, LPS followed by ATP (2.5 mM, 1 h), or cytochalasin D (Cyto D, 10  $\mu\text{M}$ , 30 min) as determined using flow cytometric analysis after incubating with zymosan-FITC (5 particles/cell, 30 min)

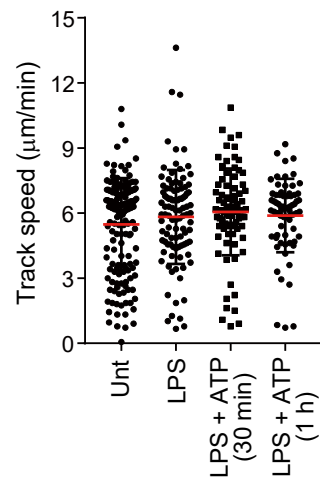

**Supplementary Figure S11. Migration ability of inflammasome-active neutrophils.** Quantification of track speed of BMNs treated with LPS (0.25 μg/mL, 2.5 h) alone or followed by ATP (2.5 mM), as determined using *in vitro* migration assays.

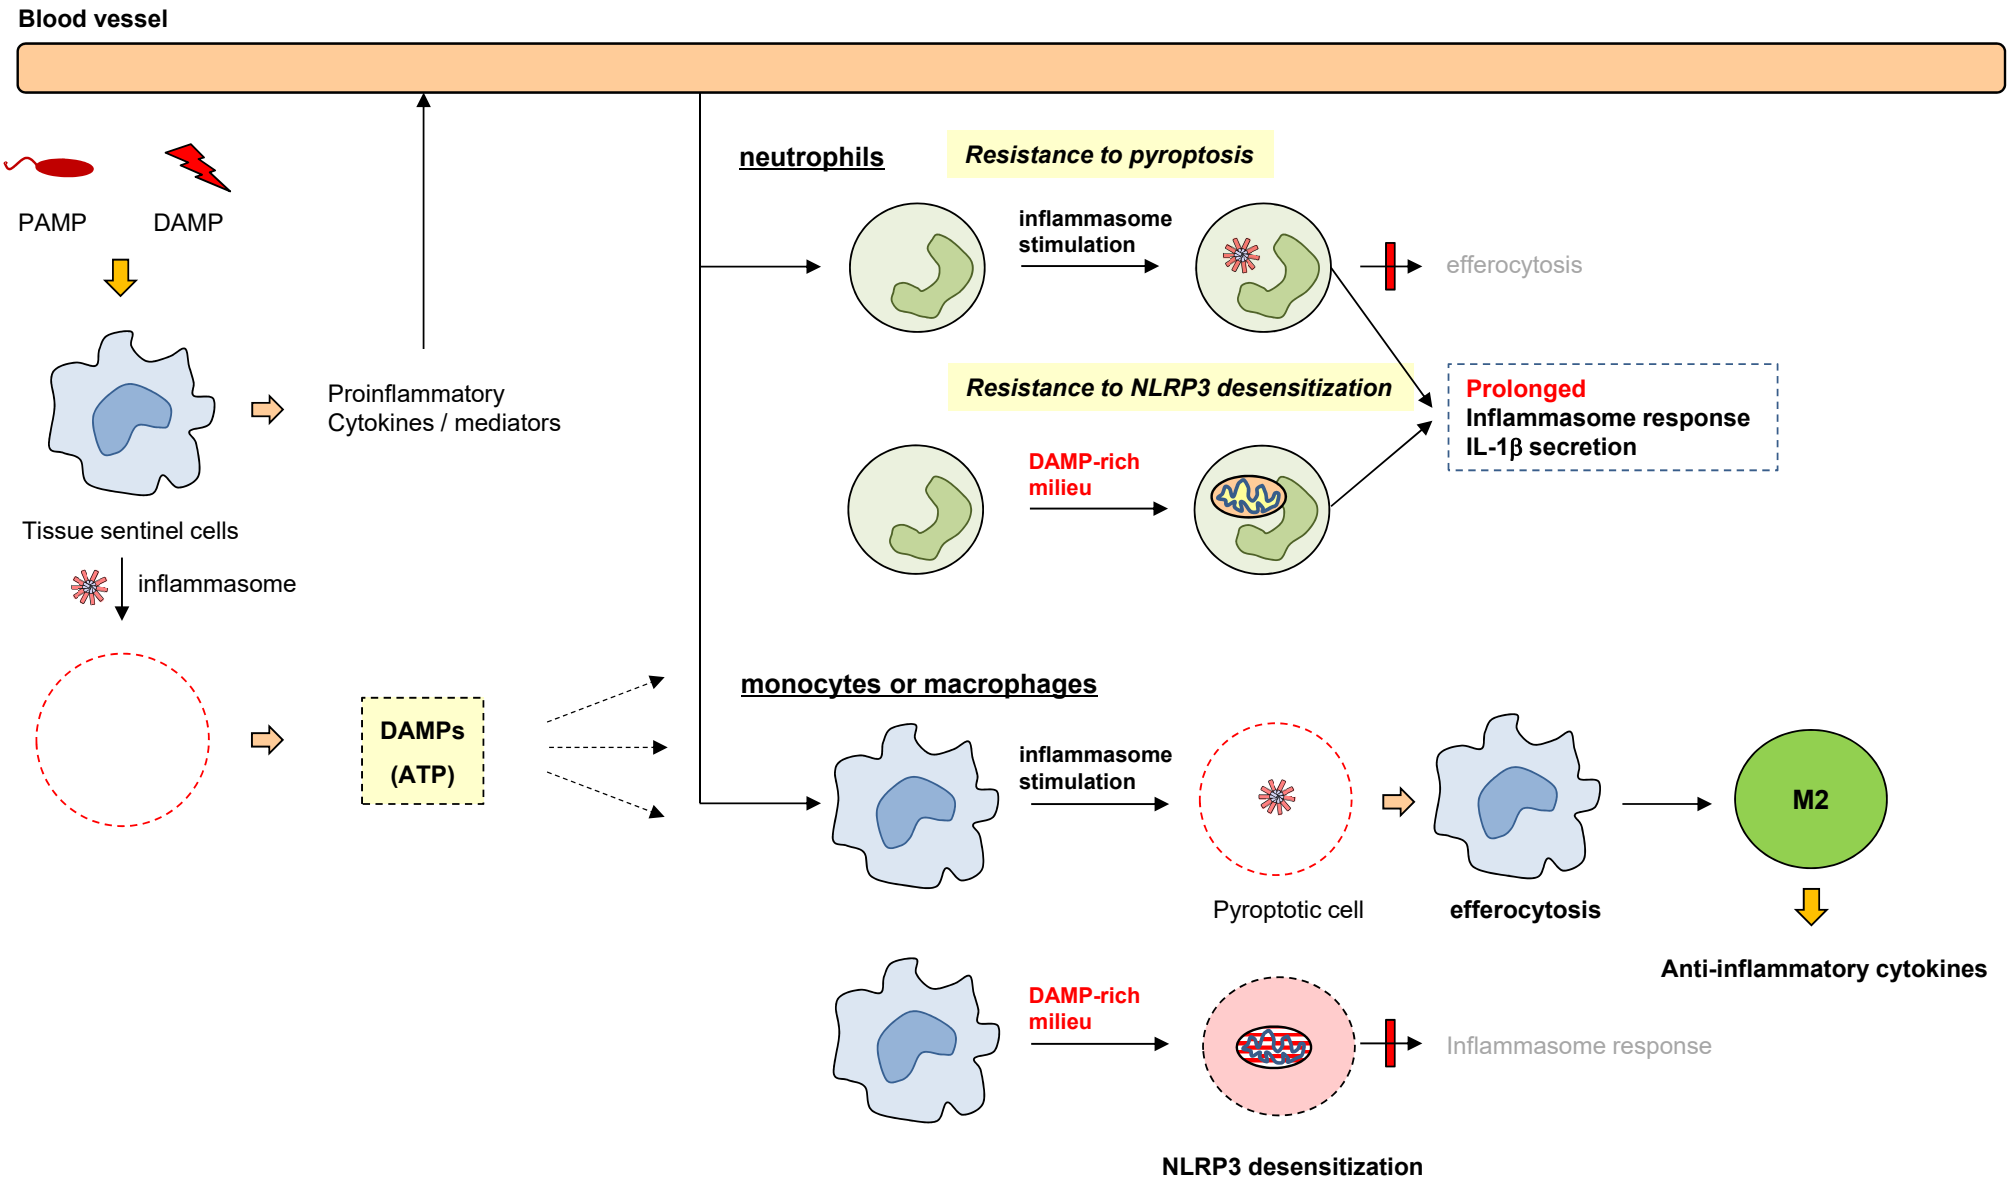

Supplementary Figure S12. Proposed role of neutrophils for inflammasome-mediated responses in the DAMP-rich milieu.
